# Supplementary material for: Origin Identification of Hungarian Honey Using Melissopalynology, Physicochemical Analysis, and Near Infrared Spectroscopy
Source: MDPI journal article supplement (doi:10.3390/molecules26237274), 2021-11-30
Supplement: s1 [file s1]

Table S3 Confusion matrix of the model of the NIR data for the classification of geographical origin

|                             |                         | Great Plain | Transdanubian Hills | Transdanubian Mountains | Northern Mountains | Small Plain | Western Hungary |
|-----------------------------|-------------------------|-------------|---------------------|-------------------------|--------------------|-------------|-----------------|
| <b>Traning</b><br>43.06%    | Great Plain             | 83.92       | 60                  | 45.45                   | 68.42              | 53.85       | 48.78           |
|                             | Transdanubian Hills     | 4.2         | 32                  | 9.09                    | 2.63               | 0           | 2.44            |
|                             | Transdanubian Mountains | 0           | 0                   | 36.36                   | 0                  | 0           | 0               |
|                             | Northern Mountains      | 4.9         | 8                   | 9.09                    | 28.95              | 0           | 2.44            |
|                             | Small Plain             | 2.8         | 0                   | 0                       | 0                  | 30.77       | 0               |
|                             | Western Hungary         | 4.2         | 0                   | 0                       | 0                  | 15.38       | 46.34           |
|                             |                         | Great Plain | Transdanubian Hills | Transdanubian Mountains | Northern Mountains | Small Plain | Western Hungary |
| <b>Validation</b><br>40.95% | Great Plain             | 76.62       | 61.54               | 50                      | 61.9               | 71.43       | 47.83           |
|                             | Transdanubian Hills     | 6.49        | 30.77               | 16.67                   | 4.76               | 0           | 0               |
|                             | Transdanubian Mountains | 0           | 0                   | 33.33                   | 4.76               | 0           | 0               |
|                             | Northern Mountains      | 5.19        | 7.69                | 0                       | 28.57              | 0           | 4.35            |
|                             | Small Plain             | 5.19        | 0                   | 0                       | 0                  | 28.57       | 0               |
|                             | Western Hungary         | 6.49        | 0                   | 0                       | 0                  | 0           | 47.83           |
|                             |                         |             |                     |                         |                    |             |                 |
