# Supplementary material for: Origin Identification of Hungarian Honey Using Melissopalynology, Physicochemical Analysis, and Near Infrared Spectroscopy
Source: MDPI journal article supplement (doi:10.3390/molecules26237274), 2021-11-30
Supplement: s1 [file s1]

Table S2 Confusion matrix of the model of the pollen data for the classification of geographical origin

|                             |                            | Great Plain | Transdanubian<br>Hills | Transdanubian<br>Mountains | Northern Mountains | Small<br>Plain | Western<br>Hungary |
|-----------------------------|----------------------------|-------------|------------------------|----------------------------|--------------------|----------------|--------------------|
| <b>Traning</b><br>64.42%    | Great Plain                | 68.18       | 0                      | 0                          | 40                 | 25             | 16.67              |
|                             | Transdanubian<br>Hills     | 9.09        | 75                     | 0                          | 0                  | 0              | 0                  |
|                             | Transdanubian<br>Mountains | 0           | 0                      | 50                         | 0                  | 0              | 0                  |
|                             | Northern<br>Mountains      | 13.64       | 0                      | 0                          | 60                 | 25             | 0                  |
|                             | Small Plain                | 9.09        | 0                      | 0                          | 0                  | 50             | 0                  |
|                             | Western Hungary            | 0           | 25                     | 50                         | 0                  | 0              | 83.33              |
|                             |                            | Great Plain | Transdanubian<br>Hills | Transdanubian<br>Mountains | Northern Mountains | Small<br>Plain | Western<br>Hungary |
| <b>Validation</b><br>58.01% | Great Plain                | 81.82       | 50                     | 0                          | 100                | 50             | 33.33              |
|                             | Transdanubian<br>Hills     | 0           | 50                     | 0                          | 0                  | 0              | 0                  |
|                             | Transdanubian<br>Mountains | 0           | 0                      | 100                        | 0                  | 0              | 0                  |
|                             | Northern<br>Mountains      | 18.18       | 0                      | 0                          | 0                  | 0              | 0                  |
|                             | Small Plain                | 0           | 0                      | 0                          | 0                  | 50             | 0                  |
|                             | Western Hungary            | 0           | 0                      | 0                          | 0                  | 0              | 66.67              |
|                             |                            |             |                        |                            |                    |                |                    |
