# Supplementary material for: Origin Identification of Hungarian Honey Using Melissopalynology, Physicochemical Analysis, and Near Infrared Spectroscopy
Source: MDPI journal article supplement (doi:10.3390/molecules26237274), 2021-11-30
Supplement: s1 [file s1]

**Table S5 List of the analyzed samples and their botanical and geographical sources**

| <b>SampleID</b> | <b>Year</b> | <b>Longitude</b> | <b>Latitude</b> | <b>Altitude</b> | <b>District (járás)</b> | <b>County (megye)</b>      | <b>Subregion</b>   | <b>Region</b>      |
|-----------------|-------------|------------------|-----------------|-----------------|-------------------------|----------------------------|--------------------|--------------------|
| Acacia_6        | 2015        | 21.75371         | 47.599          | 132             | Debreceni járás         | Hajdú-Bihar megye          | Észak-Alföld       | Great Plain        |
| Acacia_29       | 2015        | 19.80056         | 48.0961         | 239             | Salgótarjáni járás      | Nógrád megye               | Észak-Magyarország | Northern Mountains |
| Acacia_63       | 2015        | 20.43557         | 47.3364         | 84              | Szolnoki járás          | Jász-Nagykun-Szolnok megye | Észak-Alföld       | Great Plain        |
| Acacia_97       | 2016        | 20.4925          | 47.4995         | 87              | Hevesi járás            | Heves megye                | Észak-Magyarország | Great Plain        |
| Acacia_101      | 2016        | 20.3743665       | 47.8989887      | 169             | Egri járás              | Heves megye                | Észak-Magyarország | Northern Mountains |
| Acacia_110      | 2018        | 21.5078944       | 47.6716617      | 121             | Hajdúböszörményi járás  | Hajdú-Bihar megye          | Észak-Alföld       | Great Plain        |
| Acacia_134      | 2017        | 20.4925          | 47.4995         | 87              | Hevesi járás            | Heves megye                | Észak-Magyarország | Great Plain        |
| Acacia_145      | 2016        | 17.6165901       | 47.645238       | 114             | Győri járás             | Győr-Moson-Sopron megye    | Nyugat-Dunántúl    | Small Plain        |
| Acacia_146      | 2017        | 17.6165901       | 47.645238       | 114             | Győri járás             | Győr-Moson-Sopron megye    | Nyugat-Dunántúl    | Small Plain        |
| Acacia_148      | 2017        | 19.19536         | 47.8579         | 271             | Rétsági járás           | Nógrád megye               | Észak-Magyarország | Northern Mountains |
| Acacia_153      | 2018        | 20.2015503       | 48.069769       | 214             | NA                      | Heves megye                | Észak-Magyarország | Northern Mountains |
| Acacia_157      | 2017        | 20.5             | 47              | NA              | NA                      | NA                         | NA                 | Great Plain        |
| Acacia_160      | 2018        | 20.4925          | 47.4995         | 87              | Hevesi járás            | Heves megye                | Észak-Magyarország | Great Plain        |
| Acacia_171      | 2019        | 21.1347821       | 48.4657695      | 213             | Encsi járás             | Borsod-Abaúj-Zemplén megye | Észak-Magyarország | Northern Mountains |
| Acacia_172      | 2019        | 17.3015774       | 47.2744171      | 129             | Pápai járás             | Veszprém megye             | Közép-Dunántúl     | Small Plain        |
| Acacia_173      | 2020        | 16.8894692       | 46.6713343      | 228             | NA                      | Zala megye                 | Nyugat-Dunántúl    | Western Hungary    |

| SampleID           | Year | Longitude   | Latitude    | Altitude   | District (járás)  | County (megye)               | Subregion          | Region          |
|--------------------|------|-------------|-------------|------------|-------------------|------------------------------|--------------------|-----------------|
| Acacia_178         | 2019 | 20.6560717  | 47.6435536  | 20.6560717 | Füzesabonyi járás | Heves megye                  | Észak-Magyarország | Great Plain     |
| Acacia_179         | 2017 | 19.6977     | 47.11838    | 130        | Ceglédi járás     | Pest megye                   | Közép-Magyarország | Great Plain     |
| Acacia_182         | 2018 | 20.07364353 | 47.32830815 | NA         | Jászberényi járás | Jász-Nagykun-Szolnok megye   | Észak-Alföld       | Great Plain     |
| Bastard indigo_66  | 2016 | 20.43557    | 47.3364     | 84         | Szolnoki járás    | Jász-Nagykun-Szolnok megye   | Észak-Alföld       | Great Plain     |
| Bastard indigo_70  | 2016 | 20.6318292  | 47.3699089  | 91         | Kunhegyesi járás  | Jász-Nagykun-Szolnok megye   | Észak-Alföld       | Great Plain     |
| Bastard indigo_72  | 2016 | 20.7546669  | 47.2162053  | 85         | Karcagi járás     | Jász-Nagykun-Szolnok megye   | Észak-Alföld       | Great Plain     |
| Bastard indigo_131 | 2018 | 21.4279002  | 47.8452241  | 99         | Hajdúnánási járás | Hajdú-Bihar megye            | Észak-Alföld       | Great Plain     |
| Bastard indigo_152 | 2018 | 20.438295   | 47.3979955  | 86         | NA                | Jász-Nagykun-Szolnok megye   | Észak-Alföld       | Great Plain     |
| Bastard indigo_177 | 2019 | 20.6560717  | 47.6435536  | 20.6560717 | Füzesabonyi járás | Heves megye                  | Észak-Magyarország | Great Plain     |
| Bastard indigo_194 | 2020 | 21.5373392  | 48.1728908  | 102        | Ibrányi járás     | Szabolcs-Szatmár-Bereg megye | Észak-Alföld       | Great Plain     |
| Chestnut_51        | 2015 | 17.5361     | 46.87973    | 206        | Dunántúl          | Vas megye                    | Nyugat-Dunántúl    | Western Hungary |
| Chestnut_59        | 2015 | 16.8894692  | 46.6713343  | 228        | NA                | Zala megye                   | Nyugat-Dunántúl    | Western Hungary |
| Chestnut_68        | 2016 | 16.5983457  | 47.6803063  | 224        | Soproni járás     | Győr-Moson-Sopron megye      | Nyugat-Dunántúl    | Western Hungary |
| Chestnut_73        | 2016 | 16.8894692  | 46.6713343  | 228        | NA                | Zala megye                   | Nyugat-Dunántúl    | Western Hungary |
| Chestnut_105       | 2017 | 16.4938314  | 47.3455478  | 349        | Kőszegi járás     | Vas megye                    | Nyugat-Dunántúl    | Western Hungary |
| Chestnut_128       | 2018 | 16.4938314  | 47.3455478  | 349        | Kőszegi járás     | Vas megye                    | Nyugat-Dunántúl    | Western Hungary |

| SampleID     | Year | Longitude  | Latitude   | Altitude | District (járás) | County (megye)             | Subregion          | Region                  |
|--------------|------|------------|------------|----------|------------------|----------------------------|--------------------|-------------------------|
| Chestnut_158 | 2016 | 17.88148   | 46.2031    | 193      | Szigetvári járás | Baranya megye              | Dél-Dunántúl       | Transdanubian Hills     |
| Chestnut_161 | 2019 | 16.8894692 | 46.6713343 | 228      | NA               | Zala megye                 | Nyugat-Dunántúl    | Western Hungary         |
| Chestnut_162 | 2019 | 17.77198   | 47.1672    | NA       | Veszprémi járás  | Veszprém megye             | Közép-Dunántúl     | Transdanubian Mountains |
| Chestnut_186 | 2019 | NA         | NA         | NA       | NA               | NA                         | NA                 | NA                      |
| Honeydew_48  | 2015 | 20.17316   | 47.5829    | 100      | Jászapáti járás  | Jász-Nagykun-Szolnok megye | Észak-Alföld       | Great Plain             |
| Honeydew_55  | 2015 | 19.95      | 47.8833    | NA       | Északi hegység   | Északi hegység             | Észak-Magyarország | Northern Mountains      |
| Honeydew_62  | 2015 | 20.43557   | 47.3364    | 84       | Szolnoki járás   | Jász-Nagykun-Szolnok megye | Észak-Alföld       | Great Plain             |
| Honeydew_71  | 2016 | NA         | NA         | NA       | NA               | NA                         | NA                 | NA                      |
| Honeydew_85  | 2016 | 21.3842    | 48.1865    | 96       | Tokaji járás     | Borsod-Abaúj-Zemplén megye | Észak-Magyarország | Northern Mountains      |
| Honeydew_130 | 2018 | 21.626     | 47.5314    | 122      | Debreceni járás  | Hajdú-Bihar megye          | Észak-Alföld       | Great Plain             |
| Honeydew_147 | 2017 | 19.5467411 | 47.2860696 | 138      | Monori járás     | Pest megye                 | Közép-Magyarország | Great Plain             |
| Honeydew_170 | 2018 | 19.2893163 | 47.825568  | 300      | Váci járás       | Pest megye                 | Közép-Magyarország | Northern Mountains      |
| Honeydew_188 | 2019 | NA         | NA         | NA       | NA               | NA                         | NA                 | NA                      |
| Honeydew_189 | 2020 | NA         | NA         | NA       | NA               | NA                         | NA                 | NA                      |
| Linden_35    | 2015 | 17.88148   | 46.2031    | 193      | Szigetvári járás | Baranya megye              | Dél-Dunántúl       | Transdanubian Hills     |
| Linden_60    | 2015 | 20.43557   | 47.3364    | 84       | Szolnoki járás   | Jász-Nagykun-Szolnok megye | Észak-Alföld       | Great Plain             |
| Linden_103   | 2016 | 19.7977516 | 47.1716447 | 106      | Ceglédi járás    | Pest megye                 | Közép-Magyarország | Great Plain             |
| Linden_129   | 2018 | 17.88148   | 46.2031    | 193      | Szigetvári járás | Baranya megye              | Dél-Dunántúl       | Transdanubian Hills     |
| Linden_136   | 2017 | 18.0237865 | 46.7892822 | 154      | Tabi járás       | Somogy megye               | Dél-Dunántúl       | Transdanubian Hills     |
| Linden_149   | 2019 | 17.88148   | 46.2031    | 193      | Szigetvári járás | Baranya megye              | Dél-Dunántúl       | Transdanubian Hills     |
| Linden_150   | 2017 | 18.9705776 | 47.7848912 | 250      | NA               | NA                         | NA                 | NA                      |

| SampleID     | Year | Longitude  | Latitude   | Altitude   | District (járás)    | County (megye)               | Subregion          | Region                  |
|--------------|------|------------|------------|------------|---------------------|------------------------------|--------------------|-------------------------|
| Linden_156   | 2017 | 20.5       | 47         | NA         | NA                  | NA                           | NA                 | Great Plain             |
| Linden_164   | 2019 | 17.77198   | 47.1672    | NA         | Veszprémi járás     | Veszprém megye               | Közép-Dunántúl     | Transdanubian Mountains |
| Linden_165   | 2018 | 17.88148   | 46.2031    | 193        | Szigetvári járás    | Baranya megye                | Dél-Dunántúl       | Transdanubian Hills     |
| Linden_183   | 2019 | 17.77198   | 47.1672    | NA         | Veszprémi járás     | Veszprém megye               | Közép-Dunántúl     | Transdanubian Mountains |
| Rape_88      | 2016 | 20.4925    | 47.4995    | 87         | Szolnoki járás      | Jász-Nagykun-Szolnok megye   | Észak-Alföld       | Great Plain             |
| Rape_133     | 2018 | 21.2366013 | 48.030817  | 94         | Győri járás         | Győr-Moson-Sopron megye      | Nyugat-Dunántúl    | Small Plain             |
| Rape_155     | 2019 | NA         | NA         | NA         | Győri járás         | Győr-Moson-Sopron megye      | Nyugat-Dunántúl    | Small Plain             |
| Rape_168     | 2017 | 20.74598   | 48.3108    | 132        | Győri járás         | Győr-Moson-Sopron megye      | Nyugat-Dunántúl    | Small Plain             |
| Rape_169     | 2020 | 16.5406843 | 47.3894949 | 277        | Békési járás        | Békés megye                  | Dél-Alföld         | Great Plain             |
| Rape_174     | 2020 | 20.4925    | 47.4995    | 87         | Paksi járás         | Tolna megye                  | Dél-Dunántúl       | Great Plain             |
| Rape_176     | 2019 | 20.6560717 | 47.6435536 | 20.6560717 | NA                  | Jász-Nagykun-Szolnok megye   | Észak-Alföld       | Great Plain             |
| Rape_180     | 2016 | 20.4925    | 47.4995    | 87         | Balatonalmádi járás | Veszprém megye               | Közép-Dunántúl     | Great Plain             |
| Rape_181     | 2017 | 20.4925    | 47.4995    | 87         | Edelényi járás      | Borsod-Abaúj-Zemplén megye   | Észak-Magyarország | Northern Mountains      |
| Rape_184     | 2020 | 18.7576092 | 47.1385777 | 0          | Füzesabonyi Járás   | Heves megye                  | Észak-Magyarország | Great Plain             |
| Milkweed_32  | 2015 | 19.476022  | 46.7514033 | 108        | Hevesi járás        | Heves megye                  | Észak-Magyarország | Great Plain             |
| Milkweed_50  | 2015 | 19.6821    | 46.6889    | 111        | Tiszavasvári járás  | Szabolcs-Szatmár-Bereg megye | Észak-Alföld       | Great Plain             |
| Milkweed_52  | 2015 | 19.2313617 | 47.3011895 | 110        | NA                  | NA                           | NA                 | NA                      |
| Milkweed_132 | 2018 | 19.4833076 | 46.4278497 | 126        | Edelényi járás      | Borsod-Abaúj-Zemplén megye   | Észak-Magyarország | Northern Mountains      |

| SampleID      | Year | Longitude  | Latitude    | Altitude   | District (járás)       | County (megye)             | Subregion          | Region             |
|---------------|------|------------|-------------|------------|------------------------|----------------------------|--------------------|--------------------|
| Milkweed_185  | 2019 | 18.9822596 | 46.2519797  | 95         | Kőszegi járás          | Vas megye                  | Nyugat-Dunántúl    | Western Hungary    |
| Milkweed_187  | 2020 | NA         | NA          | NA         | Hevesi járás           | Heves megye                | Észak-Magyarország | Great Plain        |
| Milkweed_190  | 2020 | 19.2225016 | 46.8752316  | 99         | Füzesabonyi Járás      | Heves megye                | Észak-Magyarország | Great Plain        |
| Milkweed_191  | 2020 | 19.6928133 | 46.9080769  | 122        | Hevesi járás           | Heves megye                | Észak-Magyarország | Great Plain        |
| Milkweed_192  | 2020 | 19.4326126 | 47.2995594  | 128        | Hevesi járás           | Heves megye                | Észak-Magyarország | Great Plain        |
| Milkweed_193  | 2020 | 20.6052    | 48.519135   | 372        | NA                     | Fejér megye                | Közép-Dunántúl     | Great Plain        |
| Sunflower_65  | 2015 | 20.43557   | 47.3364     | 84         | Kecskeméti járás       | Bács-Kiskun megye          | Dél-Alföld         | Great Plain        |
| Sunflower_137 | 2015 | 17.6165901 | 47.645238   | 114        | Kiskunfélegyházi járás | Bács-Kiskun megye          | Dél-Alföld         | Great Plain        |
| Sunflower_138 | 2016 | 17.6165901 | 47.645238   | 114        | Gyáli járás            | Pest megye                 | Közép-Magyarország | Great Plain        |
| Sunflower_139 | 2017 | 17.6165901 | 47.645238   | 114        | Kiskunhalasi járás     | Bács-Kiskun megye          | Dél-Alföld         | Great Plain        |
| Sunflower_140 | 2017 | 21.2126944 | 46.8121382  | 84         | NA                     | Bács-Kiskun megye          | Dél-Alföld         | Great Plain        |
| Sunflower_141 | 2017 | 18.8119    | 46.53001    | 100        | NA                     | NA                         | NA                 | NA                 |
| Sunflower_151 | 2018 | 20.59977   | 47.476      | 87         | Kunszentmiklósi járás  | Bács-Kiskun megye          | Dél-Alföld         | Great Plain        |
| Sunflower_166 | 2019 | 18.2076416 | 47.40838766 | 233        | Kecskeméti járás       | Bács-Kiskun megye          | Dél-Alföld         | Great Plain        |
| Sunflower_167 | 2017 | 20.74598   | 48.3108     | 132        | Monori járás           | Pest megye                 | Közép-Magyarország | Great Plain        |
| Sunflower_175 | 2017 | 20.6560717 | 47.6435536  | 20.6560717 | Edelényi járás         | Borsod-Abaúj-Zemplén megye | Észak-Magyarország | Northern Mountains |

NA – Not available
