# Supplementary material for: Origin Identification of Hungarian Honey Using Melissopalynology, Physicochemical Analysis, and Near Infrared Spectroscopy
Source: MDPI journal article supplement (doi:10.3390/molecules26237274), 2021-11-30
Supplement: s1 [file s1]

**Table S6 - Pretreatments of the NIR spectra**

| Number | Pretreatment (combination)                                                                                                                                                             |
|--------|----------------------------------------------------------------------------------------------------------------------------------------------------------------------------------------|
| 1      | Savitzky-Golay Smoothing 13 sample points, 2 <sup>nd</sup> polynomial no derivation                                                                                                    |
| 2      | Savitzky-Golay Smoothing 17 sample points, 2 <sup>nd</sup> polynomial no derivation                                                                                                    |
| 3      | Savitzky-Golay Smoothing 21 sample points, 2 <sup>nd</sup> polynomial no derivation                                                                                                    |
| 4      | Standard Normal Variate                                                                                                                                                                |
| 5      | Multiplicative scatter correction                                                                                                                                                      |
| 6      | Detrending                                                                                                                                                                             |
| 7      | Detrending + Multiplicative scatter correction                                                                                                                                         |
| 8      | Detrending + Standard Normal Variate                                                                                                                                                   |
| 9      | Savitzky-Golay Smoothing 13 sample points, 2 <sup>nd</sup> polynomial no derivation + Standard Normal Variate                                                                          |
| 10     | Savitzky-Golay Smoothing 17 sample points, 2 <sup>nd</sup> polynomial no derivation + Standard Normal Variate                                                                          |
| 11     | Savitzky-Golay Smoothing 21 sample points, 2 <sup>nd</sup> polynomial no derivation + Standard Normal Variate                                                                          |
| 12     | Savitzky-Golay Smoothing 13 sample points, 2 <sup>nd</sup> polynomial no derivation + Multiplicative scatter correction                                                                |
| 13     | Savitzky-Golay Smoothing 17 sample points, 2 <sup>nd</sup> polynomial no derivation + Multiplicative scatter correction                                                                |
| 14     | Savitzky-Golay Smoothing 21 sample points, 2 <sup>nd</sup> polynomial no derivation + Multiplicative scatter correction                                                                |
| 15     | Savitzky-Golay Smoothing 13 sample points, 2 <sup>nd</sup> polynomial no derivation + Detrending                                                                                       |
| 16     | Savitzky-Golay Smoothing 17 sample points, 2 <sup>nd</sup> polynomial no derivation + Detrending                                                                                       |
| 17     | Savitzky-Golay Smoothing 21 sample points, 2 <sup>nd</sup> polynomial no derivation + Detrending                                                                                       |
| 18     | Savitzky-Golay Smoothing 13 sample points, 2 <sup>nd</sup> polynomial no derivation + Detrending + Standard Normal Variate                                                             |
| 19     | Savitzky-Golay Smoothing 17 sample points, 2 <sup>nd</sup> polynomial no derivation + Detrending + Standard Normal Variate                                                             |
| 20     | Savitzky-Golay Smoothing 21 sample points, 2 <sup>nd</sup> polynomial no derivation + Detrending + Standard Normal Variate                                                             |
| 21     | Savitzky-Golay Smoothing 13 sample points, 2 <sup>nd</sup> polynomial no derivation + Detrending + Multiplicative scatter correction                                                   |
| 22     | Savitzky-Golay Smoothing 17 sample points, 2 <sup>nd</sup> polynomial no derivation + Detrending + Multiplicative scatter correction                                                   |
| 23     | Savitzky-Golay Smoothing 21 sample points, 2 <sup>nd</sup> polynomial no derivation + Detrending + Multiplicative scatter correction                                                   |
| 24     | Savitzky-Golay Smoothing 21 sample points, 2 <sup>nd</sup> polynomial no derivation + Savitzky-Golay Smoothing 21 sample points, 2 <sup>nd</sup> polynomial 1 <sup>st</sup> derivative |
| 25     | Savitzky-Golay Smoothing 21 sample points, 2 <sup>nd</sup> polynomial no derivation + Savitzky-Golay Smoothing 21 sample points, 2 <sup>nd</sup> polynomial 2 <sup>nd</sup> derivative |
| 26     | Savitzky-Golay Smoothing 21 sample points, 2 <sup>nd</sup> polynomial no derivation + Savitzky-Golay Smoothing 13 sample points, 2 <sup>nd</sup> polynomial 1 <sup>st</sup> derivative |

| Number | Pretreatment (combination)                                                                                                                                                             |
|--------|----------------------------------------------------------------------------------------------------------------------------------------------------------------------------------------|
| 27     | Savitzky-Golay Smoothing 21 sample points, 2 <sup>nd</sup> polynomial no derivation + Savitzky-Golay Smoothing 13 sample points, 2 <sup>nd</sup> polynomial 2 <sup>nd</sup> derivative |
| 28     | Savitzky-Golay Smoothing 21 sample points, 2 <sup>nd</sup> polynomial no derivation + Savitzky-Golay Smoothing 17 sample points, 2 <sup>nd</sup> polynomial 1 <sup>st</sup> derivative |
| 29     | Savitzky-Golay Smoothing 21 sample points, 2 <sup>nd</sup> polynomial no derivation + Savitzky-Golay Smoothing 17 sample points, 2 <sup>nd</sup> polynomial 2 <sup>nd</sup> derivative |
| 30     | Savitzky-Golay Smoothing 13 sample points, 2 <sup>nd</sup> polynomial no derivation + Savitzky-Golay Smoothing 21 sample points, 2 <sup>nd</sup> polynomial 1 <sup>st</sup> derivative |
| 31     | Savitzky-Golay Smoothing 13 sample points, 2 <sup>nd</sup> polynomial no derivation + Savitzky-Golay Smoothing 21 sample points, 2 <sup>nd</sup> polynomial 2 <sup>nd</sup> derivative |
| 32     | Savitzky-Golay Smoothing 13 sample points, 2 <sup>nd</sup> polynomial no derivation + Savitzky-Golay Smoothing 13 sample points, 2 <sup>nd</sup> polynomial 1 <sup>st</sup> derivative |
| 33     | Savitzky-Golay Smoothing 13 sample points, 2 <sup>nd</sup> polynomial no derivation + Savitzky-Golay Smoothing 13 sample points, 2 <sup>nd</sup> polynomial 2 <sup>nd</sup> derivative |
| 34     | Savitzky-Golay Smoothing 13 sample points, 2 <sup>nd</sup> polynomial no derivation + Savitzky-Golay Smoothing 17 sample points, 2 <sup>nd</sup> polynomial 1 <sup>st</sup> derivative |
| 35     | Savitzky-Golay Smoothing 13 sample points, 2 <sup>nd</sup> polynomial no derivation + Savitzky-Golay Smoothing 17 sample points, 2 <sup>nd</sup> polynomial 2 <sup>nd</sup> derivative |
| 36     | Savitzky-Golay Smoothing 17 sample points, 2 <sup>nd</sup> polynomial no derivation + Savitzky-Golay Smoothing 21 sample points, 2 <sup>nd</sup> polynomial 1 <sup>st</sup> derivative |
| 37     | Savitzky-Golay Smoothing 17 sample points, 2 <sup>nd</sup> polynomial no derivation + Savitzky-Golay Smoothing 21 sample points, 2 <sup>nd</sup> polynomial 2 <sup>nd</sup> derivative |
| 38     | Savitzky-Golay Smoothing 17 sample points, 2 <sup>nd</sup> polynomial no derivation + Savitzky-Golay Smoothing 17 sample points, 2 <sup>nd</sup> polynomial 1 <sup>st</sup> derivative |
| 39     | Savitzky-Golay Smoothing 17 sample points, 2 <sup>nd</sup> polynomial no derivation + Savitzky-Golay Smoothing 17 sample points, 2 <sup>nd</sup> polynomial 2 <sup>nd</sup> derivative |
| 40     | Savitzky-Golay Smoothing 17 sample points, 2 <sup>nd</sup> polynomial no derivation + Savitzky-Golay Smoothing 13 sample points, 2 <sup>nd</sup> polynomial 1 <sup>st</sup> derivative |
| 41     | Savitzky-Golay Smoothing 17 sample points, 2 <sup>nd</sup> polynomial no derivation + Savitzky-Golay Smoothing 13 sample points, 2 <sup>nd</sup> polynomial 2 <sup>nd</sup> derivative |
