# Supplementary material for: Origin Identification of Hungarian Honey Using Melissopalynology, Physicochemical Analysis, and Near Infrared Spectroscopy
Source: MDPI journal article supplement (doi:10.3390/molecules26237274), 2021-11-30
Supplement: s1 [file s1]

Table S4 Confusion matrix of the model of the fused data for the classification of geographical origin

|                             |                            | Great Plain | Transdanubian<br>Hills | Transdanubian<br>Mountains | Northern Mountains | Small<br>Plain | Western<br>Hungary |
|-----------------------------|----------------------------|-------------|------------------------|----------------------------|--------------------|----------------|--------------------|
| <b>Traning</b><br>83.79%    | Great Plain                | 94.67       | 0                      | 0                          | 25.64              | 0              | 13.95              |
|                             | Transdanubian<br>Hills     | 0           | 84                     | 0                          | 0                  | 0              | 0                  |
|                             | Transdanubian<br>Mountains | 0           | 0                      | 63.64                      | 0                  | 0              | 0                  |
|                             | Northern<br>Mountains      | 2           | 0                      | 0                          | 74.36              | 0              | 0                  |
|                             | Small Plain                | 3.33        | 0                      | 0                          | 0                  | 100            | 0                  |
|                             | Western Hungary            | 0           | 16                     | 36.36                      | 0                  | 0              | 86.05              |
|                             |                            | Great Plain | Transdanubian<br>Hills | Transdanubian<br>Mountains | Northern Mountains | Small<br>Plain | Western<br>Hungary |
|                             | Great Plain                | 94.29       | 0                      | 0                          | 25                 | 0              | 14.29              |
| <b>Validation</b><br>81.60% | Transdanubian<br>Hills     | 0           | 84.62                  | 0                          | 0                  | 0              | 0                  |
|                             | Transdanubian<br>Mountains | 0           | 0                      | 50                         | 0                  | 0              | 0                  |
|                             | Northern<br>Mountains      | 2.86        | 0                      | 0                          | 75                 | 0              | 0                  |
|                             | Small Plain                | 2.86        | 0                      | 0                          | 0                  | 100            | 0                  |
|                             | Western Hungary            | 0           | 15.38                  | 50                         | 0                  | 0              | 85.71              |
