# Supplementary material for: Origin Identification of Hungarian Honey Using Melissopalynology, Physicochemical Analysis, and Near Infrared Spectroscopy
Source: MDPI journal article supplement (doi:10.3390/molecules26237274), 2021-11-30
Supplement: s1 [file s1]

Table S1. The most important pollen types of the honeydew and milkweed honeys

| Sample       | Predominant pollen >45%             | Secondary pollen 16-45%                                                                              | Important minor pollen 4-15%                                                                                                                                                                                                 |
|--------------|-------------------------------------|------------------------------------------------------------------------------------------------------|------------------------------------------------------------------------------------------------------------------------------------------------------------------------------------------------------------------------------|
| Honeydew_48  |                                     | <i>Phacelia tanacetifolia</i> - 32.67%, Brassicaceae small - 16.67 <i>Helianthus annuus</i> - 16%, % | Brassicaceae medium - 13.67%                                                                                                                                                                                                 |
| Honeydew_55  |                                     | Ranunculaceae (others) - 18.64%                                                                      | <i>Zea mays</i> - 10.85%, Brassicaceae medium - 8.81%, <i>Senecio type</i> - 7.8%, <i>Trifolium</i> - 6.44%, Rosaceae - 6.44%, <i>Tilia</i> - 5.42%, <i>Plantago lanceolata type</i> - 5.08%, Poaceae (uncultivated) - 4.75% |
| Honeydew_62  |                                     | <i>Daucus/Bifora type</i> - 37%, <i>Amorpha fruticosa</i> - 16.67%                                   | <i>Ambrosia type</i> - 6.33%, <i>Androsace</i> - 6%, <i>Artemisia</i> - 6%                                                                                                                                                   |
| Honeydew_71  | <i>Solanum nigrum type</i> - 60.33% |                                                                                                      | Brassicaceae medium - 6.67%, Rosaceae - 5%                                                                                                                                                                                   |
| Honeydew_85  |                                     | <i>Amorpha fruticosa</i> - 27%, Rosaceae - 16%, <i>Filipendula ulmaria</i> - 15.33%                  | <i>Sorbus type</i> - 7%, <i>Cornus sanguinea</i> - 5.33%                                                                                                                                                                     |
| Honeydew_130 |                                     | <i>Coriandrum sativum</i> - 20.4%, <i>Foeniculum vulgare</i> - 16.05%, Fabaceae (others) - 15.38%    | Brassicaceae medium - 8.03%, <i>Ambrosia type</i> - 6.35%, <i>Carduus type</i> - 6.35%, Apiaceae (others) - 6.02%                                                                                                            |
| Honeydew_147 |                                     | <i>Amorpha fruticosa</i> - 21.67%                                                                    | <i>Phacelia tanacetifolia</i> - 10%, Brassicaceae medium - 9%, <i>Helianthus annuus</i> - 8.67%, <i>Sorbus type</i> - 5.67%, <i>Castanea sativa</i> - 4.33%,                                                                 |
| Honeydew_170 |                                     | <i>Helianthus annuus</i> - 16%, Brassicaceae medium - 15.33%                                         | Brassicaceae small - 7.33%, <i>Plantago major/media type</i> - 7.33%, <i>Carduus type</i> - 6.33%, <i>Chenopodium</i> - 5.67%, <i>Senecio type</i> - 5.33%, , <i>Artemisia</i> - 4.33%,                                      |
| Honeydew_188 |                                     | <i>Senecio type</i> - 21.67%                                                                         | <i>Trifolium</i> - 10.67%, <i>Tilia</i> - 10%, <i>Plantago lanceolata type</i> - 9.33%, Rosaceae - 8.67%, Fabaceae (others) - 7%, <i>Phacelia tanacetifolia</i> - 5.67%, <i>Plantago major/media type</i> - 4.67%            |

| Sample       | Predominant pollen >45%                | Secondary pollen 16-45%                                        | Important minor pollen 4-15%                                                                                                                                                                                                     |
|--------------|----------------------------------------|----------------------------------------------------------------|----------------------------------------------------------------------------------------------------------------------------------------------------------------------------------------------------------------------------------|
| Honeydew_189 |                                        | <i>Castanea sativa</i> - 25.99%, Brassicaceae medium - 19.74%, | <i>Quercus</i> - 12.5%, <i>Sorbus</i> type - 6.58%, <i>Ambrosia</i> type - 5.26%,                                                                                                                                                |
| Milkweed_32  |                                        | Papaveraceae (others) - 18.33%, <i>Trifolium</i> - 17%         | <i>Caltha</i> type - 11.33%, <i>Tilia</i> - 7.33%, <i>Amorpha fruticosa</i> - 6.33%, <i>Plantago lanceolata</i> type - 5.33%, <i>Carduus</i> type - 4.33%, Brassicaceae medium - 4.33%,                                          |
| Milkweed_50  |                                        | <i>Tilia</i> - 16%                                             | <i>Phacelia tanacetifolia</i> - 13.67%, %, Papaveraceae (others) - 13.33%, <i>Helianthemum</i> - 10.33%, <i>Amorpha fruticosa</i> - 6.33%, <i>Caltha</i> type - 5.33%, <i>Scrophulariaceae</i> - 5%, Brassicaceae small - 4.67%, |
| Milkweed_52  |                                        | Papaveraceae (others) - 23.67%                                 | <i>Helianthus annuus</i> - 14.33%, <i>Caltha</i> type - 10.67%, <i>Verbascum</i> - 9% Brassicaceae medium - 6.33%, Brassicaceae small - 6.33%, <i>Rosaceae</i> - 4.33%                                                           |
| Milkweed_132 |                                        | <i>Allium vineale</i> type - 37.33%                            | Brassicaceae small - 9%, <i>Verbascum</i> - 8.33%, <i>Amorpha fruticosa</i> - 6%, <i>Robinia pseudoacacia</i> - 4.67%,                                                                                                           |
| Milkweed_185 |                                        | Papaveraceae (others) - 22.33%                                 | <i>Helianthus annuus</i> - 12, <i>Plantago major-media</i> type - 10.33%, %, Brassicaceae medium - 8.33%, Brassicaceae small - 6.33%                                                                                             |
| Milkweed_187 |                                        | Brassicaceae medium - 21%, <i>Phacelia tanacetifolia</i> - 18% | Brassicaceae small - 10.67%, <i>Robinia pseudoacacia</i> - 9.33%, <i>Verbascum</i> - 6.33%, <i>Quercus</i> - 5.67%, <i>Sorbus</i> type - 5%                                                                                      |
| Milkweed_190 | <i>Phacelia tanacetifolia</i> - 51.31% | -                                                              | Brassicaceae small - 12.75%, Brassicaceae medium - 10.13%, <i>Castanea sativa</i> - 6.54%, <i>Sorbus</i> type - 6.54%                                                                                                            |

| Sample       | Predominant pollen >45% | Secondary pollen 16-45%                | Important minor pollen 4-15%                                                                                                                                                |
|--------------|-------------------------|----------------------------------------|-----------------------------------------------------------------------------------------------------------------------------------------------------------------------------|
| Milkweed_191 |                         | <i>Phacelia tanacetifolia</i> - 23.67% | Brassicaceae small - 10.67%, <i>Amorpha fruticosa</i> - 8.67%, <i>Trifolium</i> - 8.67%, Brassicaceae medium - 7.67%, <i>Sorbus type</i> - 5% <i>Echium vulgare</i> - 4.67% |
| Milkweed_192 |                         | <i>Castanea sativa</i> - 35%           | <i>Rhus typhina</i> - 8.67%, Brassicaceae small - 7.67%, <i>Echium vulgare</i> - 4.67%                                                                                      |
| Milkweed_193 |                         | <i>Sorbus type</i> - 16%               | <i>Robinia pseudoacacia</i> - 14.67%, <i>Frangula alnus</i> - 14%, <i>Rosaceae</i> - 13.33%, Brassicaceae small - 7%, <i>Amorpha fruticosa</i> - 5.33%                      |
